# Supplementary material for: Evaluation of methionine and tryptophan derivatised vehicles: Met-ac-TE3A/Trp-ac-TE3A for tumor imaging
Source: Royal Society of Chemistry journal article supplement (doi:10.1039/c5ra07138k), 2015-01-01
Supplement: c5ra07138k1.pdf [file c5ra07138k1.pdf]

## Supplementary Figures

### **Evaluation of Methionine and Tryptophan derivatised vehicles: Met-ac-TE3A/Trp-ac-TE3A for tumor imaging**

Sweta Singh<sup>a, b</sup>, Anjani K. Tiwari <sup>a</sup>, Raunak Varshney <sup>a</sup>, Rashi Mathur <sup>a</sup>, B. Singh <sup>b</sup> and Anil K. Mishra<sup>\*a</sup>

<sup>a</sup>Division of Cyclotron and Radiopharmaceutical Sciences, Institute of Nuclear Medicine and Allied Sciences, Brig. S. K. Mazumdar Road, Delhi-110054, India.

<sup>b</sup>Department of Chemistry, Banaras Hindu University, Varanasi-221005, India

**Supplementary Fig. 1** Analytical HPLC chart of **6**.

**Supplementary Fig. 2** Analytical HPLC chart of **7**.

**Supplementary Fig. 3** Species distribution diagram for the Cu<sup>II</sup> complex of Met-ac-TE3A at  $C_M=C_L=1 \times 10^{-3}$  M.

**Supplementary Fig. 4** Species distribution diagram for the Cu<sup>II</sup> complex of Trp-ac-TE3A at  $C_M=C_L=1 \times 10^{-3}$  M

**Supplementary Fig. 5** Cytotoxicity of Met-ac-TE3A conjugate in U-87MG and MCF-7 cell lines.

**Supplementary Fig. 6** Cytotoxicity of Trp-ac-TE3A conjugate in U-87MG and MCF-7 cell lines.

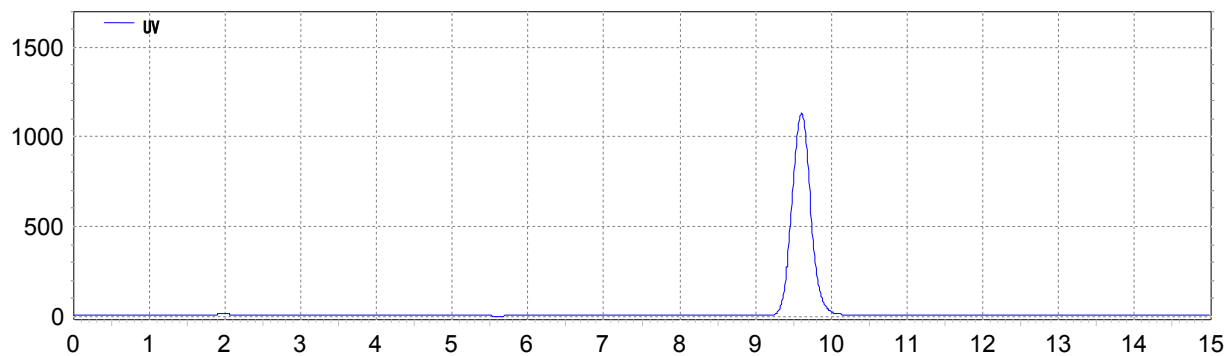

**Supplementary Fig. 1** Analytical HPLC chart of **6**.

Chemical purity: > 99% by HPLC (Capcell Pack UG80 C<sub>18</sub> column (4.6 mm i.d. × 250 mm). MeCN/H<sub>2</sub>O/ Et<sub>3</sub>N, 75/25/0.01 (v/v/v), flow rate = 1.0 mL/min,  $\lambda_{uv}$  = 254 nm); retention time ( $t_R$ ) = 9.7 min.

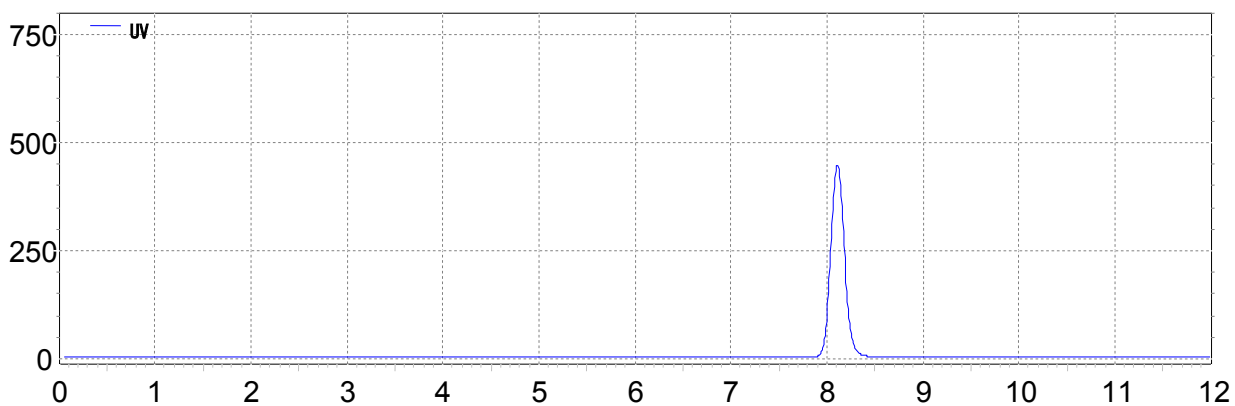

**Supplementary Fig. 2** Analytical HPLC chart of **7**.

Chemical purity: > 99% by HPLC (Capcell Pack UG80 C<sub>18</sub> column (4.6 mm i.d. × 250 mm). MeCN/H<sub>2</sub>O/ Et<sub>3</sub>N, 80/20/0.01 (v/v/v), flow rate = 1.0 mL/min,  $\lambda_{uv}$  = 254 nm); retention time ( $t_R$ ) = 8.1 min.

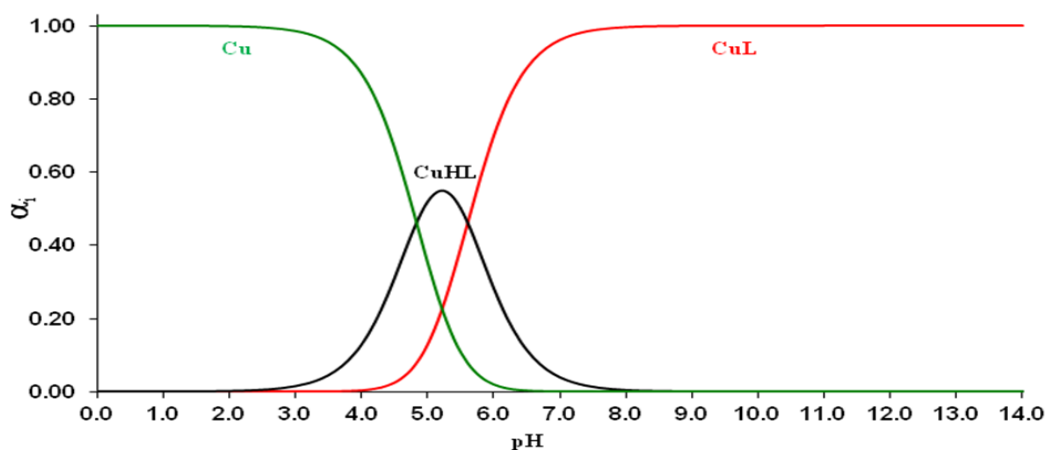

**Supplementary Fig. 3** Species distribution diagram for the Cu<sup>II</sup> complex of Met-ac-TE3A at  $C_M=C_L=1 \times 10^{-3}$  M.

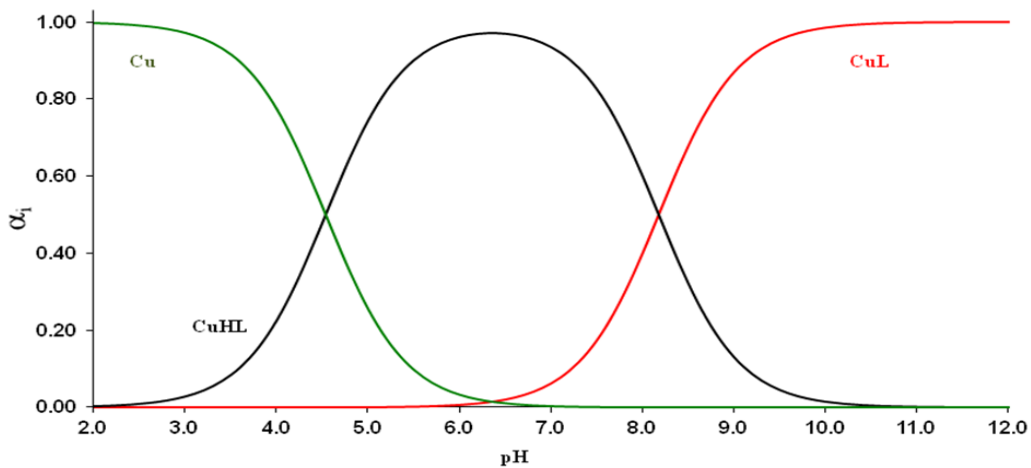

**Supplementary Fig. 4** Species distribution diagram for the Cu<sup>II</sup> complex of Trp-ac-TE3A at  $C_M=C_L=1 \times 10^{-3}$  M.

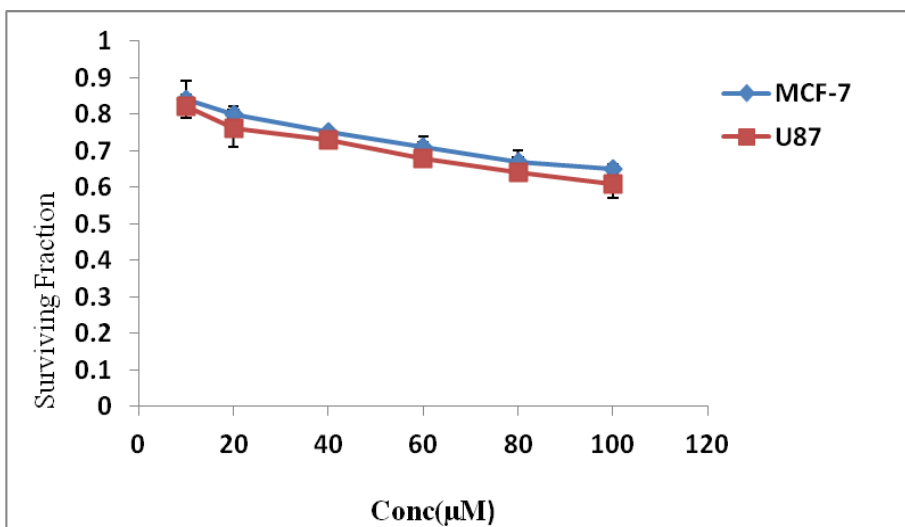

**Supplementary Fig. 5** Cytotoxicity of Met-ac-TE3A conjugate in U-87MG and MCF-7 cell lines.

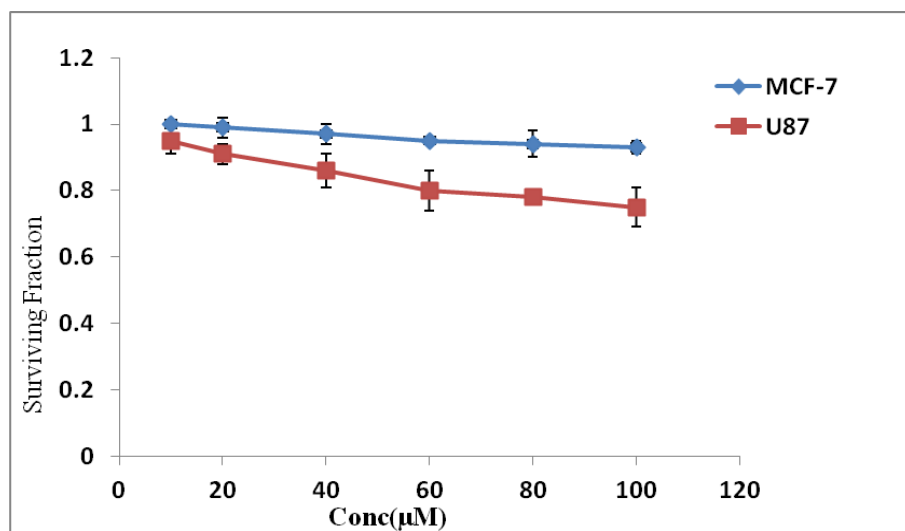

**Supplementary Fig. 6** Cytotoxicity of Trp-ac-TE3A conjugate in U-87MG and MCF-7 cell lines.
